# Supplementary material
Source: ML conference proceedings conference paper supplement (https://proceedings.neurips.cc/paper_files/paper/2020/hash/e32cc80bf07915058ce90722ee17bb71-Abstract.html)
Supplement: Supplementary file [file e32cc80bf07915058ce90722ee17bb71-Supplemental.pdf]

## Appendix

In our proofs, we use  $c, c_1, c_2, \dots$  to denote positive universal constants, the value of which may differ across instances. For a matrix  $A$ , we write  $\|A\|_{op}$  and  $\|A\|_F$  as the operator norm and Frobenius norm, respectively. For a set  $S$ , we use  $\bar{S}$  to denote the complement of the set.

### A Proof of Theorem [1](#)

Since we only analyze a single iteration, for simplicity we drop the superscript that indicates the iteration counter. Suppose that at a particular iteration, we have model parameters  $\theta_j, j \in [k]$ , for the  $k$  clusters. We denote the *estimation* of the set of worker machines that belongs to the  $j$ -th cluster by  $S_j$ , and recall that the true clusters are denoted by  $S_j^*, j \in [k]$ .

**Probability of erroneous cluster identity estimation** We begin with the analysis of the probability of incorrect cluster identity estimation. Suppose that a worker machine  $i$  belongs to  $S_j^*$ . We define the event  $\mathcal{E}_i^{j,j'}$  as the event when the  $i$ -th machine is classified to the  $j'$ -th cluster, i.e.,  $i \in S_{j'}$ . Thus the event that worker  $i$  is correctly classified is  $\mathcal{E}_i^{j,j}$ , and we use the shorthand notation  $\mathcal{E}_i := \mathcal{E}_i^{j,j}$ . We now provide the following lemma that bounds the probability of  $\mathcal{E}_i^{j,j'}$  for  $j' \neq j$ .

**Lemma 1.** *Suppose that worker machine  $i \in S_j^*$ . Let  $\rho := \frac{\Delta^2}{\sigma^2}$ . Then there exist universal constants  $c_1$  and  $c_2$  such that for any  $j' \neq j$ ,*

$$\mathbb{P}(\mathcal{E}_i^{j,j'}) \leq c_1 \exp\left(-c_2 n' \left(\frac{\rho}{\rho+1}\right)^2\right),$$

and by union bound

$$\mathbb{P}(\bar{\mathcal{E}}_i) \leq c_1 k \exp\left(-c_2 n' \left(\frac{\rho}{\rho+1}\right)^2\right).$$

We prove Lemma [1](#) in Appendix [A.1](#).

Now we proceed to analyze the gradient descent step. Without loss of generality, we only analyze the first cluster. The update rule of  $\theta_1$  in this iteration can be written as

$$\theta_1^+ = \theta_1 - \frac{\gamma}{m} \sum_{i \in S_1} \nabla F_i(\theta_1; Z_i),$$

where  $Z_i$  is the set of the  $n'$  data points that we use to compute gradient in this iteration on a particular worker machine.

We use the shorthand notation  $F_i(\theta) := F_i(\theta; Z_i)$ , and note that  $F_i(\theta)$  can be written in the matrix form as

$$F_i(\theta) = \frac{1}{n'} \|Y_i - X_i \theta\|^2,$$

where we have the feature matrix  $X_i \in \mathbb{R}^{n' \times d}$  and response vector  $Y_i = X_i \theta_1^* + \epsilon_i$ . According to our model, all the entries of  $X_i$  are i.i.d. sampled according to  $\mathcal{N}(0, 1)$ , and  $\epsilon_i \sim \mathcal{N}(0, \sigma^2 I)$ .

We first notice that

$$\|\theta_1^+ - \theta_1^*\| = \underbrace{\left\| \theta_1 - \theta_1^* - \frac{\gamma}{m} \sum_{i \in S_1 \cap S_1^*} \nabla F_i(\theta_1) \right\|}_{T_1} + \underbrace{\left\| \frac{\gamma}{m} \sum_{i \in S_1 \cap \bar{S}_1^*} \nabla F_i(\theta_1) \right\|}_{T_2} \leq \|T_1\| + \|T_2\|.$$

We control the two terms separately. Let us first focus on  $\|T_1\|$ .

**Bound  $\|T_1\|$**  To simplify notation, we concatenate all the feature matrices and response vectors of all the worker machines in  $S_1 \cap S_1^*$  and get the new feature matrix  $X \in \mathbb{R}^{N \times d}$ ,  $Y \in \mathbb{R}^N$  with

$Y = X\theta_1^* + \epsilon$ , where  $N := n'|S_1 \cap S_1^*|$ . It is then easy to verify that

$$\begin{aligned} T_1 &= (I - \frac{2\gamma}{mn'} X^\top X)(\theta_1 - \theta_1^*) + \frac{2\gamma}{mn'} X^\top \epsilon \\ &= (I - \frac{2\gamma}{mn'} \mathbb{E}[X^\top X])(\theta_1 - \theta_1^*) + \frac{2\gamma}{mn'} (\mathbb{E}[X^\top X] - X^\top X)(\theta_1 - \theta_1^*) + \frac{2\gamma}{mn'} X^\top \epsilon \\ &= (1 - \frac{2\gamma N}{mn'}) (\theta_1 - \theta_1^*) + \frac{2\gamma}{mn'} (\mathbb{E}[X^\top X] - X^\top X)(\theta_1 - \theta_1^*) + \frac{2\gamma}{mn'} X^\top \epsilon. \end{aligned}$$

Therefore

$$\|T_1\| \leq (1 - \frac{2\gamma N}{mn'}) \|\theta_1 - \theta_1^*\| + \frac{2\gamma}{mn'} \|X^\top X - \mathbb{E}[X^\top X]\|_{op} \|\theta_1 - \theta_1^*\| + \frac{2\gamma}{mn'} \|X^\top \epsilon\|. \quad (1)$$

Thus in order to bound  $\|T_1\|$ , we need to analyze two terms,  $\|X^\top X - \mathbb{E}[X^\top X]\|_{op}$  and  $\|X^\top \epsilon\|$ . To bound  $\|X^\top X - \mathbb{E}[X^\top X]\|_{op}$ , we first provide an analysis of  $N$  showing that it is large enough. Using Lemma [1](#) in conjunction with Assumption [2](#), we see that the probability of correctly classifying any worker machine  $i$ , given by  $\mathbb{P}(\mathcal{E}_i)$ , satisfies  $\mathbb{P}(\mathcal{E}_i) \geq \frac{1}{2}$ . Hence, we obtain

$$\mathbb{E}[|S_1 \cap S_1^*|] \geq \mathbb{E}[\frac{1}{2}|S_1^*|] = \frac{1}{2} p_1 m,$$

where we use the fact that  $|S_1^*| = p_1 m$ . Since  $|S_1 \cap S_1^*|$  is a sum of Bernoulli random variables with success probability at least  $\frac{1}{2}$ , we obtain

$$\mathbb{P}\left(|S_1 \cap S_1^*| \leq \frac{1}{4} p_1 m\right) \leq \mathbb{P}\left(\left||S_1 \cap S_1^*| - \mathbb{E}[|S_1 \cap S_1^*|]\right| \geq \frac{1}{4} p_1 m\right) \leq 2 \exp(-cpm),$$

where  $p = \min\{p_1, p_2, \dots, p_k\}$ , and the second step follows from Hoeffding's inequality. Hence, we obtain  $|S_1 \cap S_1^*| \geq \frac{1}{4} p_1 m$  with high probability, which yields

$$\mathbb{P}(N \geq \frac{1}{4} p_1 mn') \geq 1 - 2 \exp(-cpm). \quad (2)$$

By combining this fact with our assumption that  $pmn' \gtrsim d$ , we know that  $N \gtrsim d$ . Then, according to the concentration of the covariance of Gaussian random vectors [\[41\]](#), we know that with probability at least  $1 - 2 \exp(-\frac{1}{2}d)$ ,

$$\|X^\top X - \mathbb{E}[X^\top X]\|_{op} \leq 6\sqrt{dN} \lesssim N. \quad (3)$$

We now proceed to bound  $\|X^\top \epsilon\|$ . In particular, we use the following lemma.

**Lemma 2.** Consider a random matrix  $X \in \mathbb{R}^{N \times d}$  with i.i.d. entries sampled according to  $\mathcal{N}(0, 1)$ , and  $\epsilon \in \mathbb{R}^N$  be a random vector sampled according to  $\mathcal{N}(0, \sigma^2 I)$ , independently of  $X$ . Then we have with probability at least  $1 - 2 \exp(-c_1 \max\{d, N\})$ ,

$$\|X\|_{op} \leq c \max\{\sqrt{d}, \sqrt{N}\},$$

and with probability at least  $1 - c_2 \exp(-c_3 \min\{d, N\})$ ,

$$\|X^\top \epsilon\| \leq c_4 \sigma \sqrt{dN}.$$

We prove Lemma [2](#) in Appendix [A.2](#). Now we can combine [\(1\)](#), [\(3\)](#), [\(2\)](#), and Lemma [2](#) and obtain with probability at least  $1 - c_1 \exp(-c_2 pm) - c_3 \exp(-c_4 d)$ ,

$$\|T_1\| \leq (1 - c_5 \gamma p) \|\theta_1 - \theta_1^*\| + c_6 \gamma \sigma \sqrt{\frac{d}{mn'}}. \quad (4)$$

Since we assume that  $p \gtrsim \frac{\log m}{m}$  and  $d \gtrsim \log m$ , the success probability can be simplified as  $1 - 1/\text{poly}(m)$ .

**Bound  $\|T_2\|$**  We first condition on  $S_1$ . We have the following:

$$\nabla F_i(\theta_1) = \frac{2}{n'} X_i^\top (Y_i - X_i \theta_1).$$

For  $i \in S_1 \cap S_j^*$ , with  $j \neq 1$ , we have  $Y_i = X_i \theta_j^* + \epsilon_i$ , and so we obtain

$$n' \nabla F_i(\theta_1) = 2X_i^\top X_i (\theta_j^* - \theta_1) + 2X_i^\top \epsilon_i,$$

which yields

$$n' \|\nabla F_i(\theta_1)\| \lesssim \|X_i\|_{op}^2 + \|X_i^\top \epsilon_i\|, \quad (5)$$

where we use the fact that  $\|\theta_j^* - \theta_1\| \leq \|\theta_j^*\| + \|\theta_1^*\| + \|\theta_1^* - \theta_1\| \lesssim 1$ . Then, we combine (5) and Lemma 2 and get with probability at least  $1 - c_1 \exp(-c_2 \min\{d, n'\})$ ,

$$\|\nabla F_i(\theta_1)\| \leq \frac{1}{n'} (c_3 \max\{d, n'\} + c_4 \sigma \sqrt{dn'}) \leq c_5 \max\{1, \frac{d}{n'}\}, \quad (6)$$

where we use our assumption that  $\sigma \lesssim 1$ . By union bound, we know that with probability at least  $1 - c_1 m \exp(-c_2 \min\{d, n'\})$ , (6) holds for all  $j \in \overline{S_1^*}$ . In addition, since we assume that  $n' \gtrsim \log m$ ,  $d \gtrsim \log m$ , this probability can be lower bounded by  $1 - 1/\text{poly}(m)$ . This implies that conditioned on  $S_1$ , with probability at least  $1 - 1/\text{poly}(m)$ ,

$$\|T_2\| \leq c_5 \frac{\gamma}{m} |S_1 \cap \overline{S_1^*}| \max\{1, \frac{d}{n'}\}. \quad (7)$$

Since we choose  $\gamma = \frac{c}{p}$ , we have  $\frac{\gamma}{m} \max\{1, \frac{d}{n'}\} \lesssim 1$ , where we use our assumption that  $pmn' \gtrsim d$ . This shows that with probability at least  $1 - 1/\text{poly}(m)$ ,

$$\|T_2\| \leq c_5 |S_1 \cap \overline{S_1^*}|. \quad (8)$$

We then analyze  $|S_1 \cap \overline{S_1^*}|$ . By Lemma 1, we have

$$\mathbb{E}[|S_1 \cap \overline{S_1^*}|] \leq c_6 m \exp(-c_7 (\frac{\rho}{\rho+1})^2 n'). \quad (9)$$

According to Assumption 2, we know that  $n' \geq c (\frac{\rho+1}{\rho})^2 \log m$ , for some constant  $c$  that is large enough. Therefore,  $m \leq \exp(\frac{1}{c} (\frac{\rho}{\rho+1})^2 n')$ , and thus, as long as  $c$  is large enough such that  $\frac{1}{c} < c_7$  where  $c_7$  is defined in (9), we have

$$\mathbb{E}[|S_1 \cap \overline{S_1^*}|] \leq c_6 \exp(-c_8 (\frac{\rho}{\rho+1})^2 n'). \quad (10)$$

and then by Markov's inequality, we have

$$\mathbb{P}\left(|S_1 \cap \overline{S_1^*}| \leq c_6 \exp(-\frac{c_8}{2} (\frac{\rho}{\rho+1})^2 n')\right) \geq 1 - \exp(-\frac{c_8}{2} (\frac{\rho}{\rho+1})^2 n') \geq 1 - \text{poly}(m). \quad (11)$$

Combining (8) with (11), we know that with probability at least  $1 - 1/\text{poly}(m)$ ,

$$\|T_2\| \leq c_1 \exp(-c_2 (\frac{\rho}{\rho+1})^2 n').$$

Using this fact and (4), we obtain that with probability at least  $1 - 1/\text{poly}(m)$ ,

$$\|\theta_1^+ - \theta_1^*\| \leq (1 - c_1 \gamma p) \|\theta_1 - \theta_1^*\| + c_2 \gamma \sigma \sqrt{\frac{d}{mn'}} + c_3 \exp(-c_4 (\frac{\rho}{\rho+1})^2 n').$$

Then we can complete the proof for the first cluster by choosing  $\gamma = \frac{1}{2c_1 p}$ . To complete the proof for all the  $k$  clusters, we can use union bound, and the success probability is  $1 - k/\text{poly}(m)$ . However, since  $k \leq m$  by definition, we still have success probability  $1 - 1/\text{poly}(m)$ .

### A.1 Proof of Lemma 1

Without loss of generality, we analyze  $\mathcal{E}_i^{1,j}$  for some  $j \neq 1$ . By definition, we have

$$\mathcal{E}_i^{1,j} = \{F_i(\theta_j; \widehat{Z}_i) \leq F_i(\theta_1; \widehat{Z}_i)\},$$

where  $\widehat{Z}_i$  is the set of  $n'$  data points that we use to estimate the cluster identity in this iteration. We write the data points in  $\widehat{Z}_i$  in matrix form with feature matrix  $X_i \in \mathbb{R}^{n' \times d}$  and response vector  $Y_i = X_i \theta_1^* + \epsilon_i$ . According to our model, all the entries of  $X_i$  are i.i.d. sampled according to  $\mathcal{N}(0, 1)$ , and  $\epsilon_i \sim \mathcal{N}(0, \sigma^2 I)$ . Then, we have

$$\mathbb{P}\{\mathcal{E}_i^{1,j}\} = \mathbb{P}\{\|X_i(\theta_1^* - \theta_j) + \epsilon_i\|^2 \geq \|X_i(\theta_1^* - \theta_1) + \epsilon_i\|^2\}.$$

Consider the random vector  $X_i(\theta_1^* - \theta_j) + \epsilon_i$ , and in particular consider the  $\ell$ -th coordinate of it. Since  $X_i$  and  $\epsilon_i$  are independent and we resample  $(X_i, Y_i)$  at each iteration, the  $\ell$ -th coordinate of  $X_i(\theta_1^* - \theta_j) + \epsilon_i$  is a Gaussian random variable with mean 0 and variance  $\|\theta_j - \theta_1^*\|^2 + \sigma^2$ . Since  $X_i$  and  $\epsilon_i$  contain independent rows, the distribution of  $\|X_i(\theta_1^* - \theta_j) + \epsilon_i\|^2$  is given by  $(\|\theta_j - \theta_1^*\|^2 + \sigma^2)u_j$ , where  $u_j$  is a standard Chi-squared random variable  $n'$  degrees of freedom. We now calculate the an upper bound on the following probability:

$$\begin{aligned} & \mathbb{P}\{\|X_i(\theta_1^* - \theta_1) + \epsilon_i\|^2 \geq \|X_i(\theta_1^* - \theta_j) + \epsilon_i\|^2\} \\ & \stackrel{(i)}{\leq} \mathbb{P}\{\|X_i(\theta_1^* - \theta_j) + \epsilon_i\|^2 \leq t\} + \mathbb{P}\{\|X_i(\theta_1^* - \theta_1) + \epsilon_i\|^2 > t\} \\ & \leq \mathbb{P}\{(\|\theta_j - \theta_1^*\|^2 + \sigma^2)u_j \leq t\} + \mathbb{P}\{(\|\theta_1 - \theta_1^*\|^2 + \sigma^2)u_1 > t\}, \end{aligned} \quad (12)$$

where (i) holds for all  $t \geq 0$ . For the first term, we use the concentration property of Chi-squared random variables. Using the fact that  $\|\theta_j - \theta_1^*\| \geq \|\theta_j^* - \theta_1^*\| - \|\theta_j - \theta_j^*\| \geq \frac{3}{4}\Delta$ , we have

$$\mathbb{P}\{(\|\theta_j - \theta_1^*\|^2 + \sigma^2)u_j \leq t\} \leq \mathbb{P}\left\{\left(\frac{9}{16}\Delta^2 + \sigma^2\right)u_j \leq t\right\}. \quad (13)$$

Similarly, using the initialization condition,  $\|\theta_1 - \theta_1^*\| \leq \frac{1}{4}\Delta$ , the second term of equation (12) can be simplified as

$$\mathbb{P}\{(\|\theta_1 - \theta_1^*\|^2 + \sigma^2)u_1 > t\} \leq \mathbb{P}\left\{\left(\frac{1}{16}\Delta^2 + \sigma^2\right)u_1 > t\right\}. \quad (14)$$

Based on the above observation, we now choose  $t = n'(\frac{5}{16}\Delta^2 + \sigma^2)$ . Recall that  $\rho := \frac{\Delta^2}{\sigma^2}$ . Then the inequality (13) can be rewritten as

$$\mathbb{P}\{(\|\theta_j - \theta_1^*\|^2 + \sigma^2)u_j \leq t\} \leq \mathbb{P}\left\{\frac{u_j}{n'} - 1 \leq -\frac{4\rho}{9\rho + 16}\right\}.$$

According to the concentration results for standard Chi-squared distribution [41], we know that there exists universal constants  $c_1$  and  $c_2$  such that

$$\mathbb{P}\{(\|\theta_j - \theta_1^*\|^2 + \sigma^2)u_j \leq t\} \leq c_1 \exp\left(-c_2 n' \left(\frac{\rho}{\rho + 1}\right)^2\right). \quad (15)$$

Similarly, the inequality (14) can be rewritten as

$$\mathbb{P}\{(\|\theta_1 - \theta_1^*\|^2 + \sigma^2)u_1 > t\} \leq \mathbb{P}\left\{\frac{u_1}{n'} - 1 > \frac{4\rho}{\rho + 16}\right\}$$

and again according to the concentration of Chi-squared distribution, there exists universal constants  $c_3$  and  $c_4$  such that

$$\mathbb{P}\{(\|\theta_1 - \theta_1^*\|^2 + \sigma^2)u_1 > t\} \leq c_3 \exp\left(-c_4 n' \left(\frac{\rho}{\rho + 1}\right)^2\right). \quad (16)$$

The proof can be completed by combining (12), (15) and (16).

## A.2 Proof of Lemma 2

According to Theorem 5.39 of [40], we have with probability at least  $1 - 2 \exp(-c_1 \max\{d, N\})$ ,

$$\|X\|_{op} \leq c \max\{\sqrt{d}, \sqrt{N}\},$$

where  $c$  and  $c_1$  are universal constants. As for  $\|X^\top \epsilon\|$ , we first condition on  $X$ . According to the Hanson-Wright inequality [33], we obtain for every  $t \geq 0$

$$\mathbb{P}(\|\|X^\top \epsilon\| - \sigma \|X^\top\|_F > t) \leq 2 \exp\left(-c \frac{t^2}{\sigma^2 \|X^\top\|_{op}^2}\right). \quad (17)$$

Using Chi-squared concentration [41], we obtain with probability at least  $1 - 2 \exp(-cdN)$ ,

$$\|X\|_F \leq c\sqrt{dN}.$$

Furthermore, using the fact that  $\|X^\top\|_{op} = \|X\|_{op}$  and substituting  $t = \sigma\sqrt{dN}$  in (17), we obtain with probability at least  $1 - c_2 \exp(-c_3 \min\{d, N\})$ ,

$$\|X^\top \epsilon\| \leq c_4 \sigma \sqrt{dN}.$$

## B Proof of Theorem 2

The proof of this theorem is similar to that of the linear model. We begin with a single-step analysis.

### B.1 Analysis for a single step

Suppose that at a certain step, we have model parameters  $\theta_j, j \in [k]$  for the  $k$  clusters. Assume that  $\|\theta_j - \theta_j^*\| \leq \frac{1}{4} \sqrt{\frac{\lambda}{L}} \Delta$ , for all  $j \in [k]$ .

**Probability of erroneous cluster identity estimation:** We first calculate the probability of erroneous estimation of worker machines' cluster identity. We define the events  $\mathcal{E}_i^{j,j'}$  in the same way as in Appendix A, and have the following lemma.

**Lemma 3.** *Suppose that worker machine  $i \in S_j^*$ . Then there exists a universal constants  $c_1$  such that for any  $j' \neq j$ ,*

$$\mathbb{P}(\mathcal{E}_i^{j,j'}) \leq c_1 \frac{\eta^2}{\lambda^2 \Delta^4 n'}.$$

and by union bound

$$\mathbb{P}(\overline{\mathcal{E}}_i) \leq c_1 \frac{k\eta^2}{\lambda^2 \Delta^4 n'}.$$

We prove Lemma 3 in Appendix B.3. Now we proceed to analyze the gradient descent iteration. Without loss of generality, we focus on  $\theta_1$ . We have

$$\|\theta_1^+ - \theta_1^*\| = \|\theta_1 - \theta_1^* - \frac{\gamma}{m} \sum_{i \in S_1} \nabla F_i(\theta_1)\|,$$

where  $F_i(\theta) := F_i(\theta; Z_i)$  with  $Z_i$  being the set of data points on the  $i$ -th worker machine that we use to compute the gradient, and  $S_1$  is the set of indices returned by Algorithm 1 corresponding to the first cluster. Since

$$S_1 = (S_1 \cap S_1^*) \cup (S_1 \cap \overline{S_1^*})$$

and the sets are disjoint, we have

$$\|\theta_1^+ - \theta_1^*\| = \underbrace{\|\theta_1 - \theta_1^* - \frac{\gamma}{m} \sum_{i \in S_1 \cap S_1^*} \nabla F_i(\theta_1)\|}_{T_1} + \underbrace{\|\frac{\gamma}{m} \sum_{i \in S_1 \cap \overline{S_1^*}} \nabla F_i(\theta_1)\|}_{T_2}.$$

Using triangle inequality, we obtain

$$\|\theta_1^+ - \theta_1^*\| \leq \|T_1\| + \|T_2\|,$$

and we control both the terms separately. Let us first focus on  $\|T_1\|$ .

**Bound  $\|T_1\|$**  We first split  $T_1$  in the following way:

$$T_1 = \underbrace{\theta_1 - \theta_1^* - \hat{\gamma} \nabla F^1(\theta_1)}_{T_{11}} + \underbrace{\hat{\gamma} (\nabla F^1(\theta_1) - \frac{1}{|S_1 \cap S_1^*|} \sum_{i \in S_1 \cap S_1^*} \nabla F_i(\theta_1))}_{T_{12}}, \quad (18)$$

where  $\hat{\gamma} := \gamma \frac{|S_1 \cap S_1^*|}{m}$ . Let us condition on  $S_1$ . According to standard analysis technique for gradient descent on strongly convex functions, we know that when  $\hat{\gamma} \leq \frac{1}{L}$ ,

$$\|T_{11}\| = \|\theta_1 - \theta_1^* - \hat{\gamma} \nabla F^1(\theta_1)\| \leq (1 - \frac{\hat{\gamma} \lambda L}{\lambda + L}) \|\theta_1 - \theta_1^*\|. \quad (19)$$

Further, we have  $\mathbb{E}[\|T_{12}\|^2] = \frac{v^2}{n' |S_1 \cap S_1^*|}$ , which implies  $\mathbb{E}[\|T_{12}\|] \leq \frac{v}{\sqrt{n' |S_1 \cap S_1^*|}}$ , and thus by Markov's inequality, for any  $\delta_0 > 0$ , with probability at least  $1 - \delta_0$ ,

$$\|T_{12}\| \leq \frac{v}{\delta_0 \sqrt{n' |S_1 \cap S_1^*|}}. \quad (20)$$

We then analyze  $|S_1 \cap S_1^*|$ . Similar to the proof of Theorem 1, we can show that  $|S_1 \cap S_1^*|$  is large enough. From Lemma 3 and using our assumption, we see that the probability of correctly classifying any worker machine  $i$ , given by  $\mathbb{P}(\mathcal{E}_i)$ , satisfies  $\mathbb{P}(\mathcal{E}_i) \geq \frac{1}{2}$ . Recall  $p = \min\{p_1, p_2, \dots, p_k\}$ , and we obtain  $|S_1 \cap S_1^*| \geq \frac{1}{4} p_1 m$  with probability at least  $1 - 2 \exp(-cpm)$ . Let us condition on  $|S_1 \cap S_1^*| \geq \frac{1}{4} p_1 m$  and choose  $\gamma = 1/L$ . Then  $\hat{\gamma} \leq 1/L$  is satisfied, and on the other hand  $\hat{\gamma} \geq \frac{p}{4L}$ . Plug this fact in (19), we obtain

$$\|T_{11}\| \leq (1 - \frac{p\lambda}{8L}) \|\theta_1 - \theta_1^*\|. \quad (21)$$

We then combine (20) and (21) and have with probability at least  $1 - \delta_0 - 2 \exp(-cpm)$ ,

$$\|T_1\| \leq (1 - \frac{p\lambda}{8L}) \|\theta_1 - \theta_1^*\| + \frac{2v}{\delta_0 L \sqrt{p m n'}}. \quad (22)$$

**Bound  $\|T_2\|$**  Let us define  $T_{2j} := \sum_{S_1 \cap S_j^*} \nabla F_i(\theta_1)$ ,  $j \geq 2$ . We have  $T_2 = \frac{\gamma}{m} \sum_{j=2}^k T_{2j}$ . We condition on  $S_1$  and first analyze  $T_{2j}$ . We have

$$T_{2j} = |S_1 \cap S_j^*| \nabla F^j(\theta_1) + \sum_{i \in S_1 \cap S_j^*} (\nabla F_i(\theta_1) - \nabla F^j(\theta_1)). \quad (23)$$

Due to the smoothness of  $F^j(\theta)$ , we know that

$$\|\nabla F^j(\theta_1)\| \leq L \|\theta_1 - \theta_j^*\| \leq 3L, \quad (24)$$

where we use the fact that  $\|\theta_1 - \theta_j^*\| \leq \|\theta_j^*\| + \|\theta_1^*\| + \|\theta_1 - \theta_1^*\| \leq 1 + 1 + \frac{1}{4} \sqrt{\frac{\lambda}{L}} \Delta \leq 3$ . In addition, we have

$$\mathbb{E} \left[ \left\| \sum_{i \in S_1 \cap S_j^*} \nabla F_i(\theta_1) - \nabla F^j(\theta_1) \right\|^2 \right] = |S_1 \cap S_j^*| \frac{v^2}{n'},$$

which implies

$$\mathbb{E} \left[ \left\| \sum_{i \in S_1 \cap S_j^*} \nabla F_i(\theta_1) - \nabla F^j(\theta_1) \right\| \right] \leq \sqrt{|S_1 \cap S_j^*|} \frac{v}{\sqrt{n'}},$$

and then according to Markov's inequality, for any  $\delta_1 \in (0, 1)$ , with probability at least  $1 - \delta_1$ ,

$$\left\| \sum_{i \in S_1 \cap S_j^*} \nabla F_i(\theta_1) - \nabla F^j(\theta_1) \right\| \leq \sqrt{|S_1 \cap S_j^*|} \frac{v}{\delta_1 \sqrt{n'}}. \quad (25)$$

Then, by combining (24) and (25), we know that with probability at least  $1 - \delta_1$ ,

$$\|T_{2j}\| \leq 3L|S_1 \cap S_j^*| + \sqrt{|S_1 \cap S_j^*|} \frac{v}{\delta_1 \sqrt{n'}}. \quad (26)$$

By union bound, we know that with probability at least  $1 - k\delta_1$ , (26) applies to all  $j \neq 1$ . Then, we have with probability at least  $1 - k\delta_1$ ,

$$\|T_2\| \leq \frac{3\gamma L}{m}|S_1 \cap \overline{S_1^*}| + \frac{\gamma v \sqrt{k}}{\delta_1 m \sqrt{n'}} \sqrt{|S_1 \cap \overline{S_1^*}|}. \quad (27)$$

According to Lemma 3, we know that

$$\mathbb{E}[|S_1 \cap \overline{S_1^*}|] \leq c_1 \frac{\eta^2 m}{\lambda^2 \Delta^4 n'}.$$

Then by Markov's inequality, we know that with probability at least  $1 - \delta_2$ ,

$$|S_1 \cap \overline{S_1^*}| \leq c_1 \frac{\eta^2 m}{\delta_2 \lambda^2 \Delta^4 n'}. \quad (28)$$

Now we combine (27) with (28) and obtain with probability at least  $1 - k\delta_1 - \delta_2$ ,

$$\|T_2\| \leq c_1 \frac{\eta^2}{\delta_2 \lambda^2 \Delta^4 n'} + c_2 \frac{v \eta \sqrt{k}}{\delta_1 \sqrt{\delta_2} \lambda L \Delta^2 \sqrt{mn'}}. \quad (29)$$

Combining (22) and (29), we know that with probability at least  $1 - \delta_0 - k\delta_1 - \delta_2 - 2 \exp(-cpm)$ ,

$$\|\theta_1^+ - \theta_1^*\| \leq (1 - \frac{p\lambda}{8L}) \|\theta_1 - \theta_1^*\| + \frac{2v}{\delta_0 L \sqrt{pmn'}} + c_1 \frac{\eta^2}{\delta_2 \lambda^2 \Delta^4 n'} + c_2 \frac{v \eta \sqrt{k}}{\delta_1 \sqrt{\delta_2} \lambda L \Delta^2 \sqrt{mn'}}. \quad (30)$$

In the following, we let  $\delta_3 := \delta_0 + k\delta_1 + \delta_2 + 2 \exp(-cpm)$ , and

$$\varepsilon_0 = \frac{2v}{\delta_0 L \sqrt{pmn'}} + c_1 \frac{\eta^2}{\delta_2 \lambda^2 \Delta^4 n'} + c_2 \frac{v \eta \sqrt{k}}{\delta_1 \sqrt{\delta_2} \lambda L \Delta^2 \sqrt{mn'}}.$$

Let us simplify this expression. We first choose  $\delta \in (0, 1)$  as the failure probability of the entire algorithm. Then, we choose

$$\delta_0 = \frac{p\lambda\delta}{CkL \log(mn')}, \quad \delta_1 = \frac{p\lambda\delta}{Ck^2L \log(mn')}, \quad \delta_2 = \frac{p\lambda\delta}{CkL \log(mn')},$$

for some constant  $C > 0$  that is large enough. In addition, since we assume that  $p \gtrsim \frac{\log(mn')}{m}$ , we have  $\exp(-cpm) \leq 1/\text{poly}(mn') \lesssim \frac{p\lambda\delta}{kL \log(mn')}$ . Consider all these facts, we obtain

$$\delta_3 = \frac{4p\lambda\delta}{CkL \log(mn')}, \quad (31)$$

$$\varepsilon_0 \lesssim \frac{vk \log(mn')}{p^{3/2} \lambda \delta \sqrt{mn'}} + \frac{\eta^2 L k \log(mn')}{p \lambda^3 \delta \Delta^4 n'} + \frac{v \eta k^3 \sqrt{L} \log^{3/2}(mn')}{p^{3/2} \lambda^{5/2} \delta^{3/2} \Delta^2 \sqrt{mn'}}. \quad (32)$$

In addition, by union bound, we know that with probability at least  $1 - k\delta_3$ , for all  $j \in [k]$ ,

$$\|\theta_j^+ - \theta_j^*\| \leq (1 - \frac{p\lambda}{8L}) \|\theta_j - \theta_j^*\| + \varepsilon_0. \quad (33)$$

## B.2 Convergence of the algorithm

We now analyze the convergence of the entire algorithm. First, we can verify that as long as

$$\varepsilon_0 \leq \frac{p}{32} \left(\frac{\lambda}{L}\right)^{3/2} \Delta, \quad (34)$$

we can guarantee that  $\|\theta_j^+ - \theta_j^*\| \leq \frac{1}{4} \sqrt{\frac{\lambda}{L}} \Delta$ . We can also verify that as long as there is

$$\Delta \geq \tilde{O}(\max\{(n')^{-1/5}, m^{-1/6} (n')^{-1/3}\}), \quad (35)$$

using the definition of  $\varepsilon_0$  in (32), we know that (34) holds. Here, in the  $\tilde{\mathcal{O}}$  notation, we omit the logarithmic factors and quantities that does not depend on  $m$  and  $n'$ . In this case, we can iteratively apply (33) for  $T$  iterations and obtain that with probability at least  $1 - kT\delta_3$ ,

$$\|\theta_j^{(T)} - \theta_j^*\| \leq (1 - \frac{p\lambda}{8L})^T \|\theta_j^{(0)} - \theta_j^*\| + \frac{8L}{p\lambda} \varepsilon_0.$$

Then, we know that when we choose

$$T = \frac{8L}{p\lambda} \log\left(\frac{p\lambda\Delta}{32\varepsilon_0L}\right), \quad (36)$$

we have

$$(1 - \frac{p\lambda}{8L})^T \|\theta_j^{(0)} - \theta_j^*\| \leq \exp(-\frac{p\lambda}{8L}T) \frac{1}{4} \sqrt{\frac{\lambda}{L}} \Delta \leq \frac{8}{p} \sqrt{\frac{L}{\lambda}} \varepsilon_0,$$

which implies  $\|\theta_j^{(T)} - \theta_j^*\| \leq \frac{16L}{p\lambda} \varepsilon_0$ . Finally, we check the failure probability. The failure probability is

$$kT\delta_3 \leq \frac{8kL}{p\lambda} \log\left(\frac{p\lambda\Delta}{32\varepsilon_0L}\right) \frac{4p\lambda\delta}{CkL \log(mn')} = \frac{32\delta \log(\frac{p\lambda\Delta}{32\varepsilon_0L})}{C \log(mn')} \leq \delta \frac{\log(\frac{1}{\varepsilon_0})}{\log((mn')^{C/32})}.$$

On the other hand, according to (32), we know that

$$\frac{1}{\varepsilon_0} \leq \tilde{\mathcal{O}}(\max\{\sqrt{mn'}, n'\}),$$

then, as long as  $C$  is large enough, we can guarantee that  $(mn')^{C/32} > \frac{1}{\varepsilon_0}$ , which implies that the failure probability is upper bounded by  $\delta$ . Our final error floor can be obtained by redefining

$$\varepsilon := \frac{16L}{p\lambda} \varepsilon_0.$$

### B.3 Proof of Lemma 3

Without loss of generality, we bound the probability of  $\mathcal{E}_i^{1,j}$  for some  $j \neq 1$ . We know that

$$\mathcal{E}_i^{1,j} = \left\{ F_i(\theta_1; \widehat{Z}_i) \geq F_i(\theta_j; \widehat{Z}_i) \right\},$$

where  $\widehat{Z}_i$  is the set of  $n'$  data points that we use to estimate the cluster identity in this iteration. In the following, we use the shorthand notation  $F_i(\theta) := F_i(\theta; \widehat{Z}_i)$ . We have

$$\mathbb{P}(\mathcal{E}_i^{1,j}) \leq \mathbb{P}(F_i(\theta_1) > t) + \mathbb{P}(F_i(\theta_j) \leq t)$$

for all  $t \geq 0$ . We choose  $t = \frac{F^1(\theta_1) + F^1(\theta_j)}{2}$ . With this choice, we obtain

$$\mathbb{P}(F_i(\theta_1) > t) = \mathbb{P}\left(F_i(\theta_1) > \frac{F^1(\theta_1) + F^1(\theta_j)}{2}\right) \quad (37)$$

$$= \mathbb{P}\left(F_i(\theta_1) - F^1(\theta_1) > \frac{F^1(\theta_j) - F^1(\theta_1)}{2}\right). \quad (38)$$

Similarly, for the second term, we have

$$\mathbb{P}(F_i(\theta_j) \leq t) = \mathbb{P}\left(F_i(\theta_j) - F^1(\theta_j) \leq -\frac{F^1(\theta_j) - F^1(\theta_1)}{2}\right). \quad (39)$$

Based on our assumption, we know that  $\|\theta_j - \theta_1\| \geq \Delta - \frac{1}{4} \sqrt{\frac{\lambda}{L}} \Delta \geq \frac{3}{4} \Delta$ . According to the strong convexity of  $F^1(\cdot)$ ,

$$F^1(\theta_j) \geq F^1(\theta_1^*) + \frac{\lambda}{2} \|\theta_j - \theta_1^*\|^2 \geq F^1(\theta_1^*) + \frac{9\lambda}{32} \Delta^2,$$

and according to the smoothness of  $F^1(\cdot)$ ,

$$F^1(\theta_1) \leq F^1(\theta_1^*) + \frac{L}{2} \|\theta_1 - \theta_1^*\|^2 \leq F^1(\theta_1^*) + \frac{L}{2} \frac{\lambda}{16L} \Delta^2 = F^1(\theta_1^*) + \frac{\lambda}{32} \Delta^2.$$

Therefore,  $F^1(\theta_j) - F^1(\theta_1) \geq \frac{\lambda}{4} \Delta^2$ . Then, according to Chebyshev's inequality, we obtain that  $\mathbb{P}(F_i(\theta_1) > t) \leq \frac{64\eta^2}{\lambda^2 \Delta^4 n'}$  and that  $\mathbb{P}(F_i(\theta_j) \leq t) \leq \frac{64\eta^2}{\lambda^2 \Delta^4 n'}$ , which complete the proof.
